# Supplementary material for: Tracing the Change and Contribution of Subcutaneous Adipose to Skin Expansion Using a Luciferase-Transgenic Fat Transplantation Model
Source: PubMed Central journal article supplement — Plast Reconstr Surg. 2023 May 24;153(3):558–67. doi: 10.1097/PRS.0000000000010753 (PMC10876172; doi:10.1097/prs.0000000000010753), 2023-05-24
Supplement: prs-153-558e-s002.pdf [file prs-153-558e-s002.pdf]

**Supplemental Table. Primer information.**

| Gene Name          | Forward                   | Reverse                   |
|--------------------|---------------------------|---------------------------|
| Rat Vegf           | CACCAAAGCCAGCACATAGGAGAG  | CTGCGGATCTTGGACAAACAAATGC |
| Rat bFgf           | GAGCGACCCACACGTCAAACACTAC | CAGCCGTCCATCTTCCTTCATAGC  |
| Rat Egf            | TGACTATGACGGTGGCTCCATCC   | CCCAGTGTGTTTGTGGCTATCC    |
| Rat $\beta$ -Actin | CCTCTATGCCAACACAGT        | AGCCACCAATCCACACAG        |
