# Supplementary figures and images for: Tracing the Change and Contribution of Subcutaneous Adipose to Skin Expansion Using a Luciferase-Transgenic Fat Transplantation Model
Source: PubMed Central journal article supplement — Plast Reconstr Surg. 2023 May 24;153(3):558–67. doi: 10.1097/PRS.0000000000010753 (PMC10876172; doi:10.1097/prs.0000000000010753), 2023-05-24

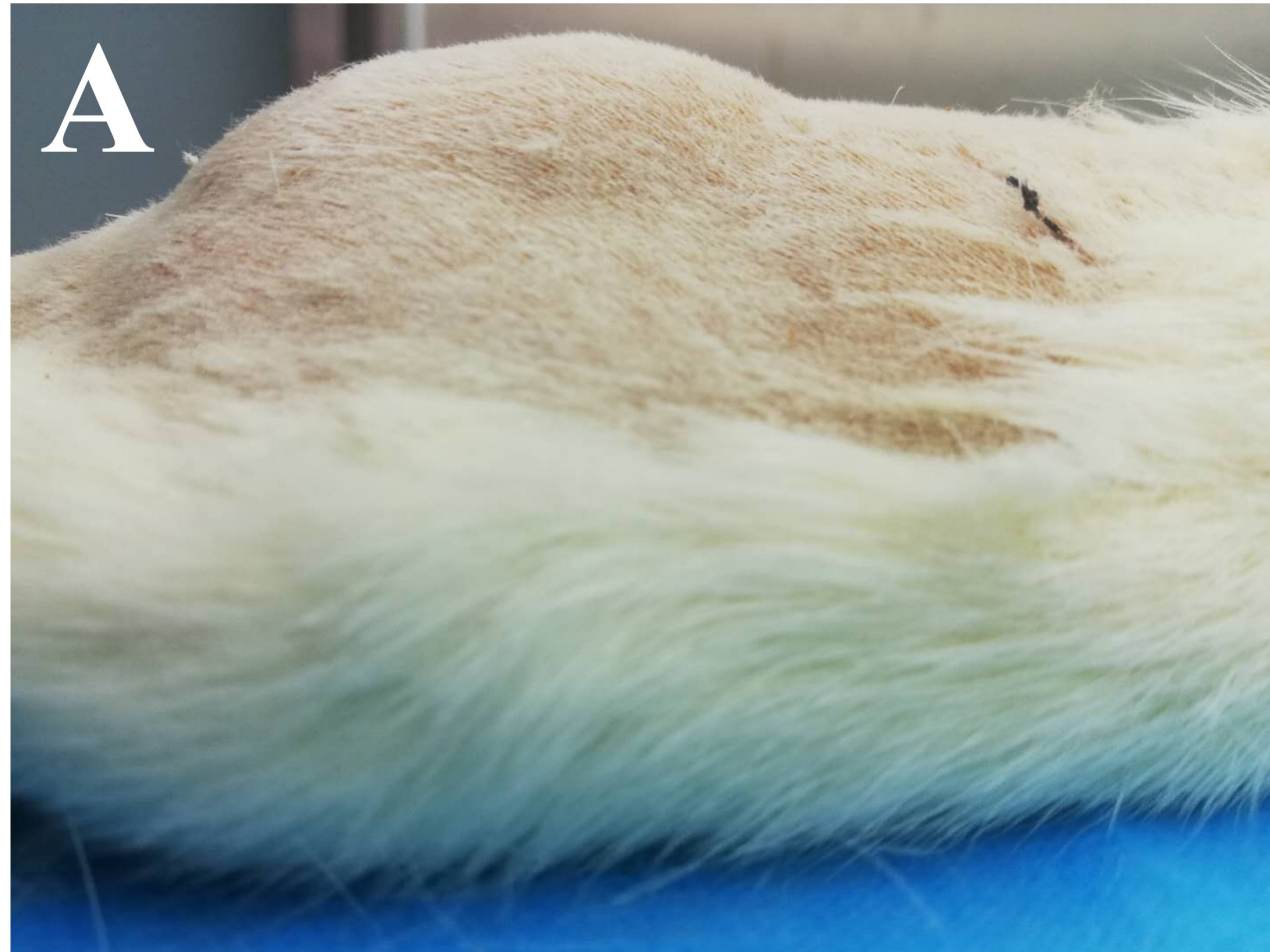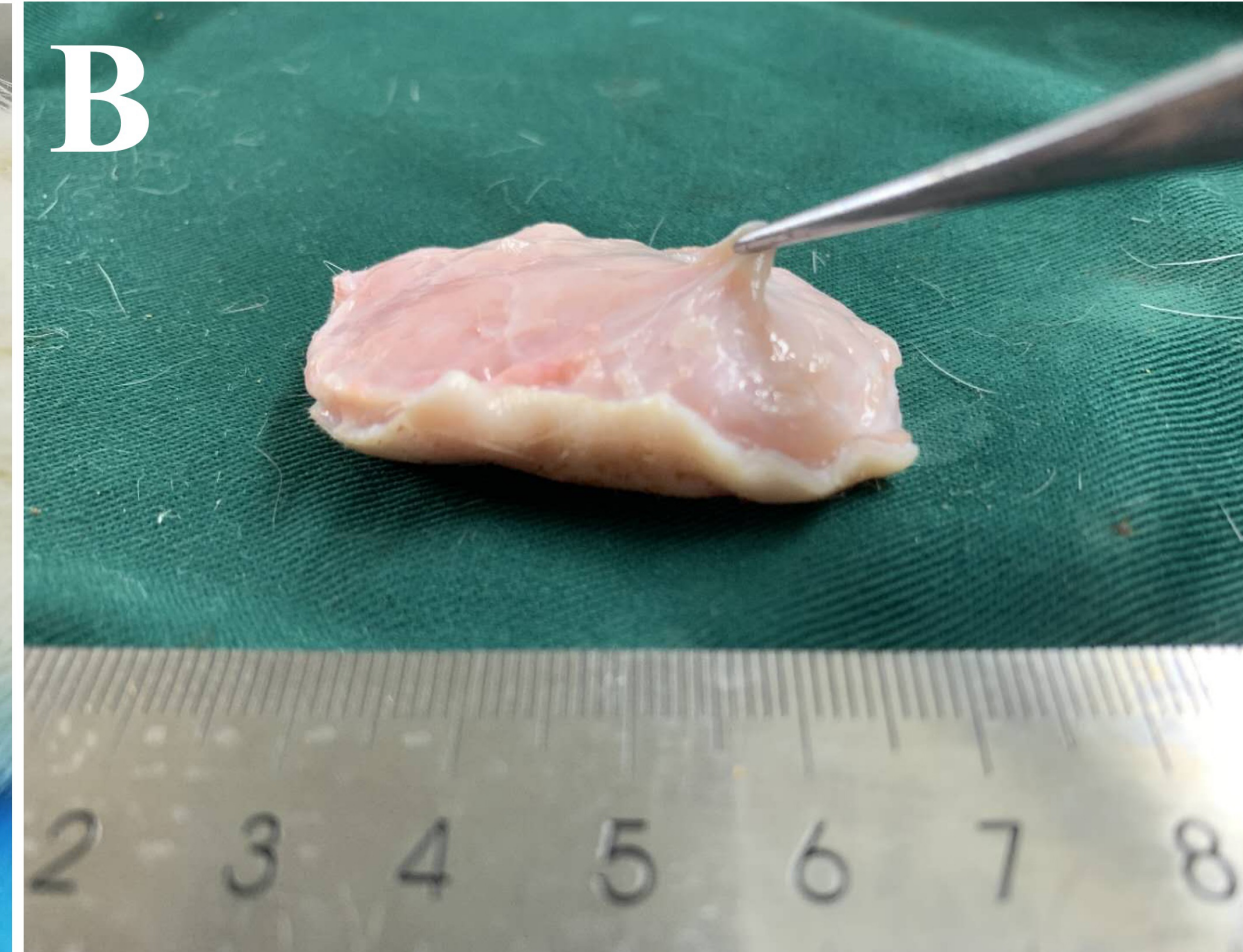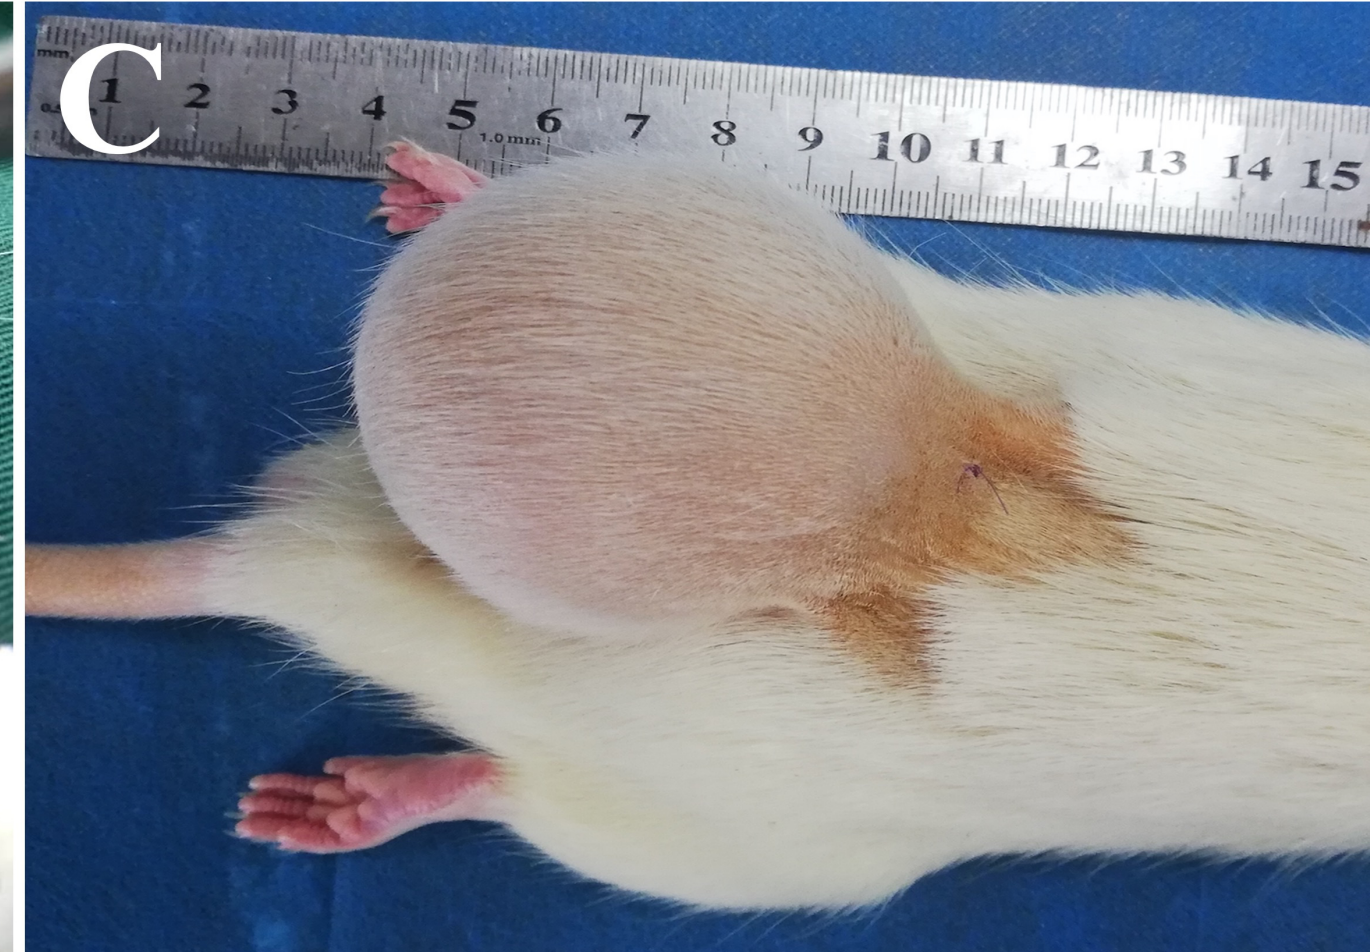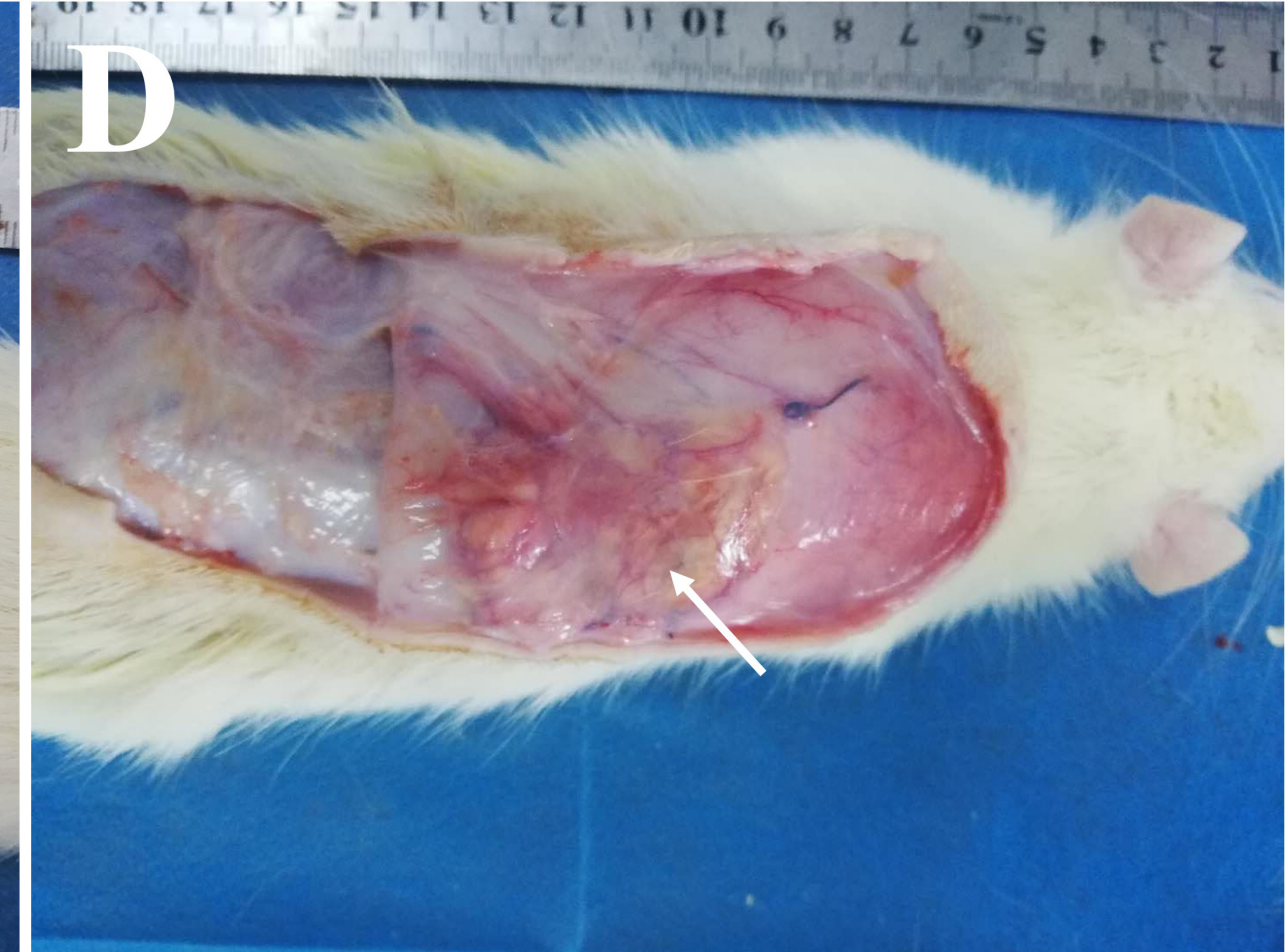

Supplement: prs-153-558e-s001.pdf [file prs-153-558e-s001.pdf]

**A**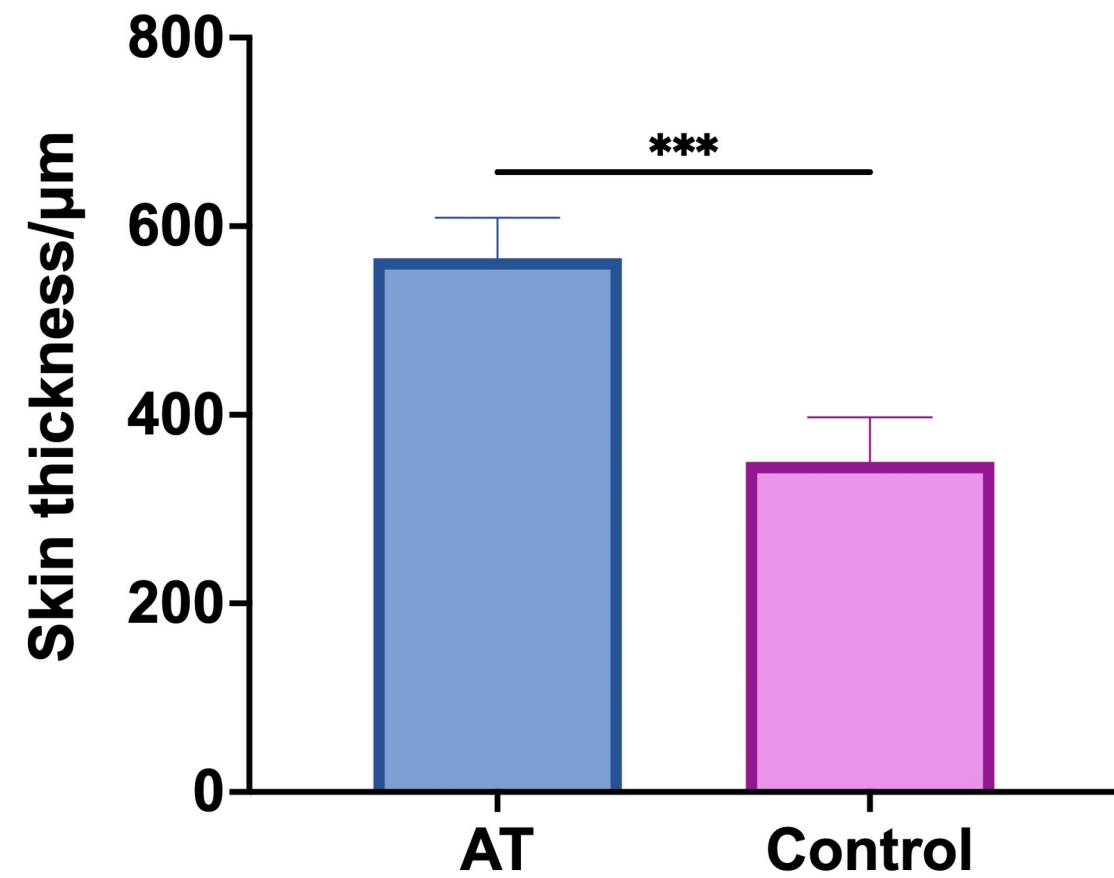**B**

AT Group

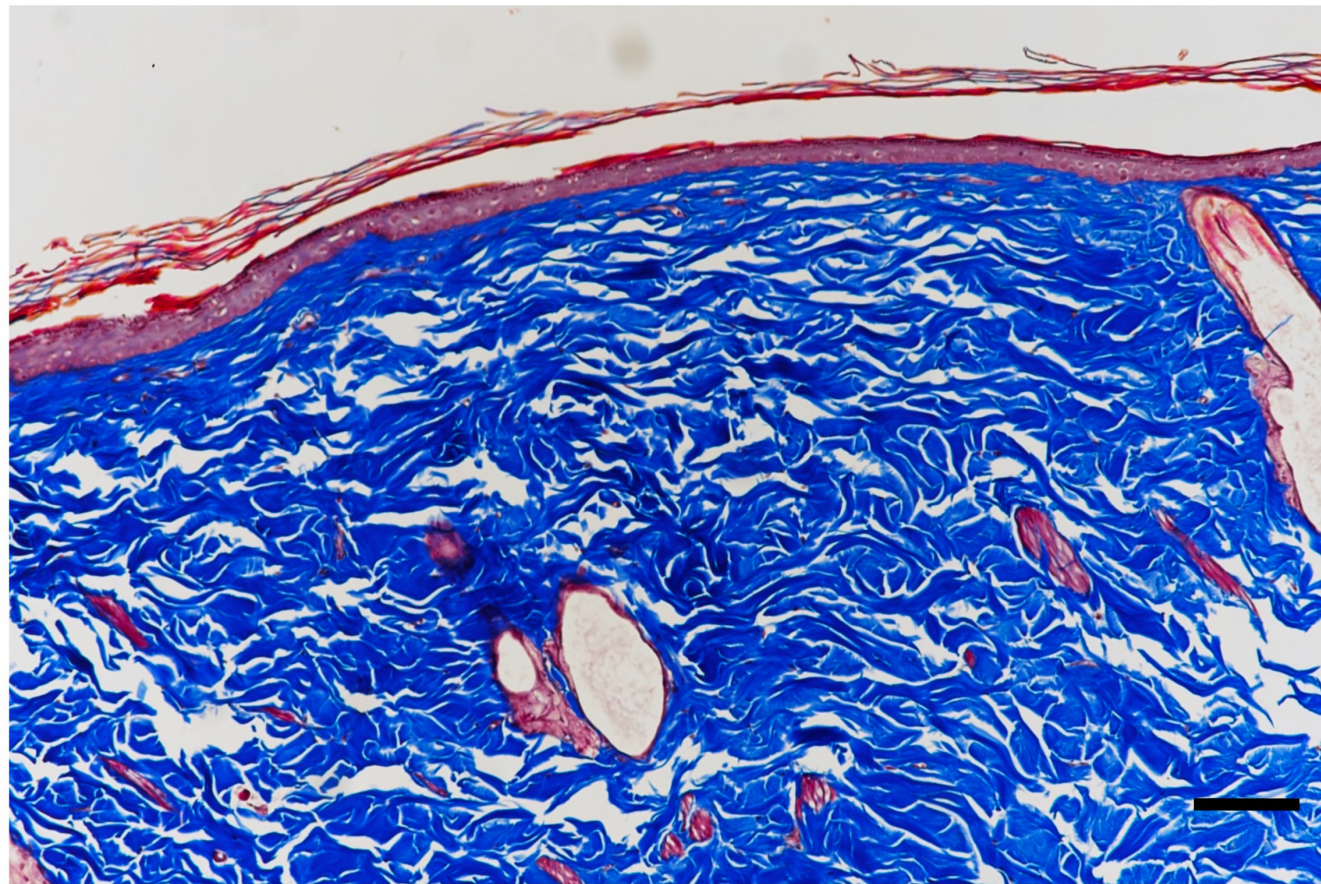

Control Group

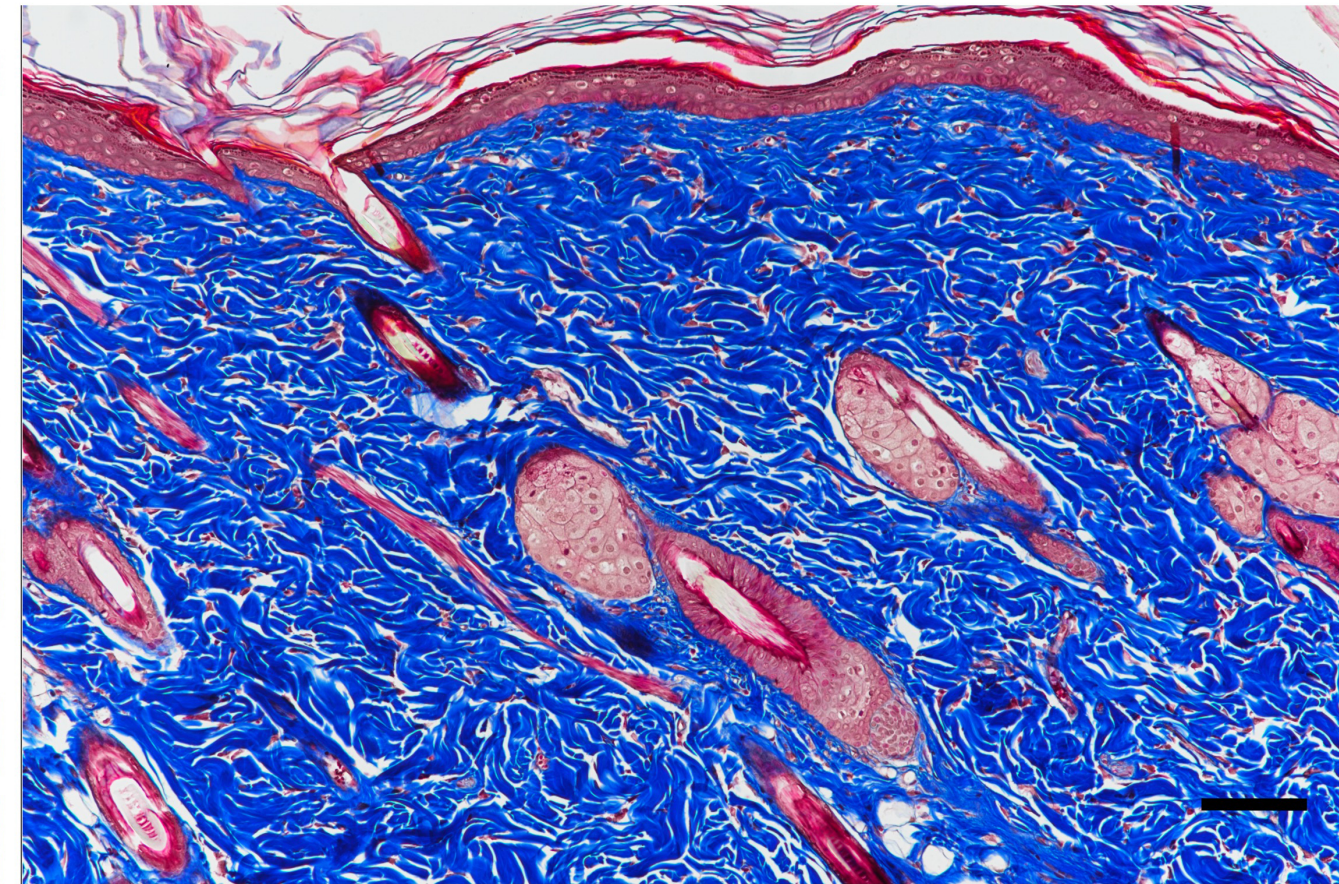

Supplement: prs-153-558e-s003.pdf [file prs-153-558e-s003.pdf]

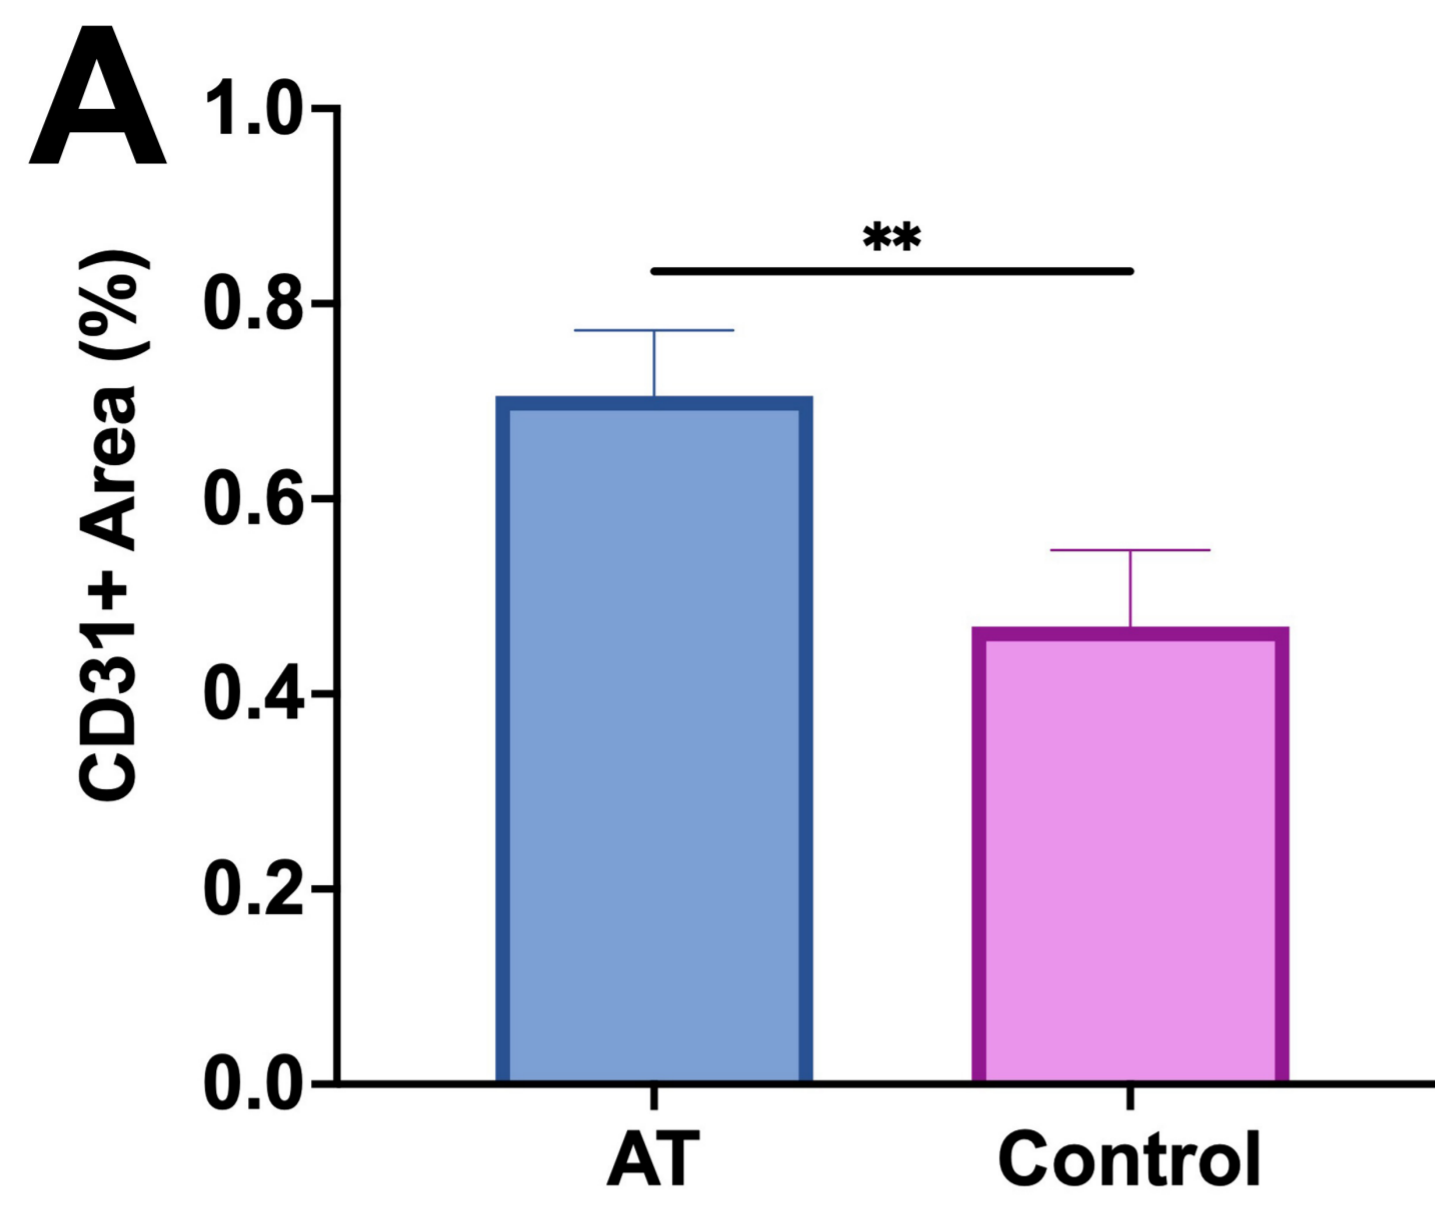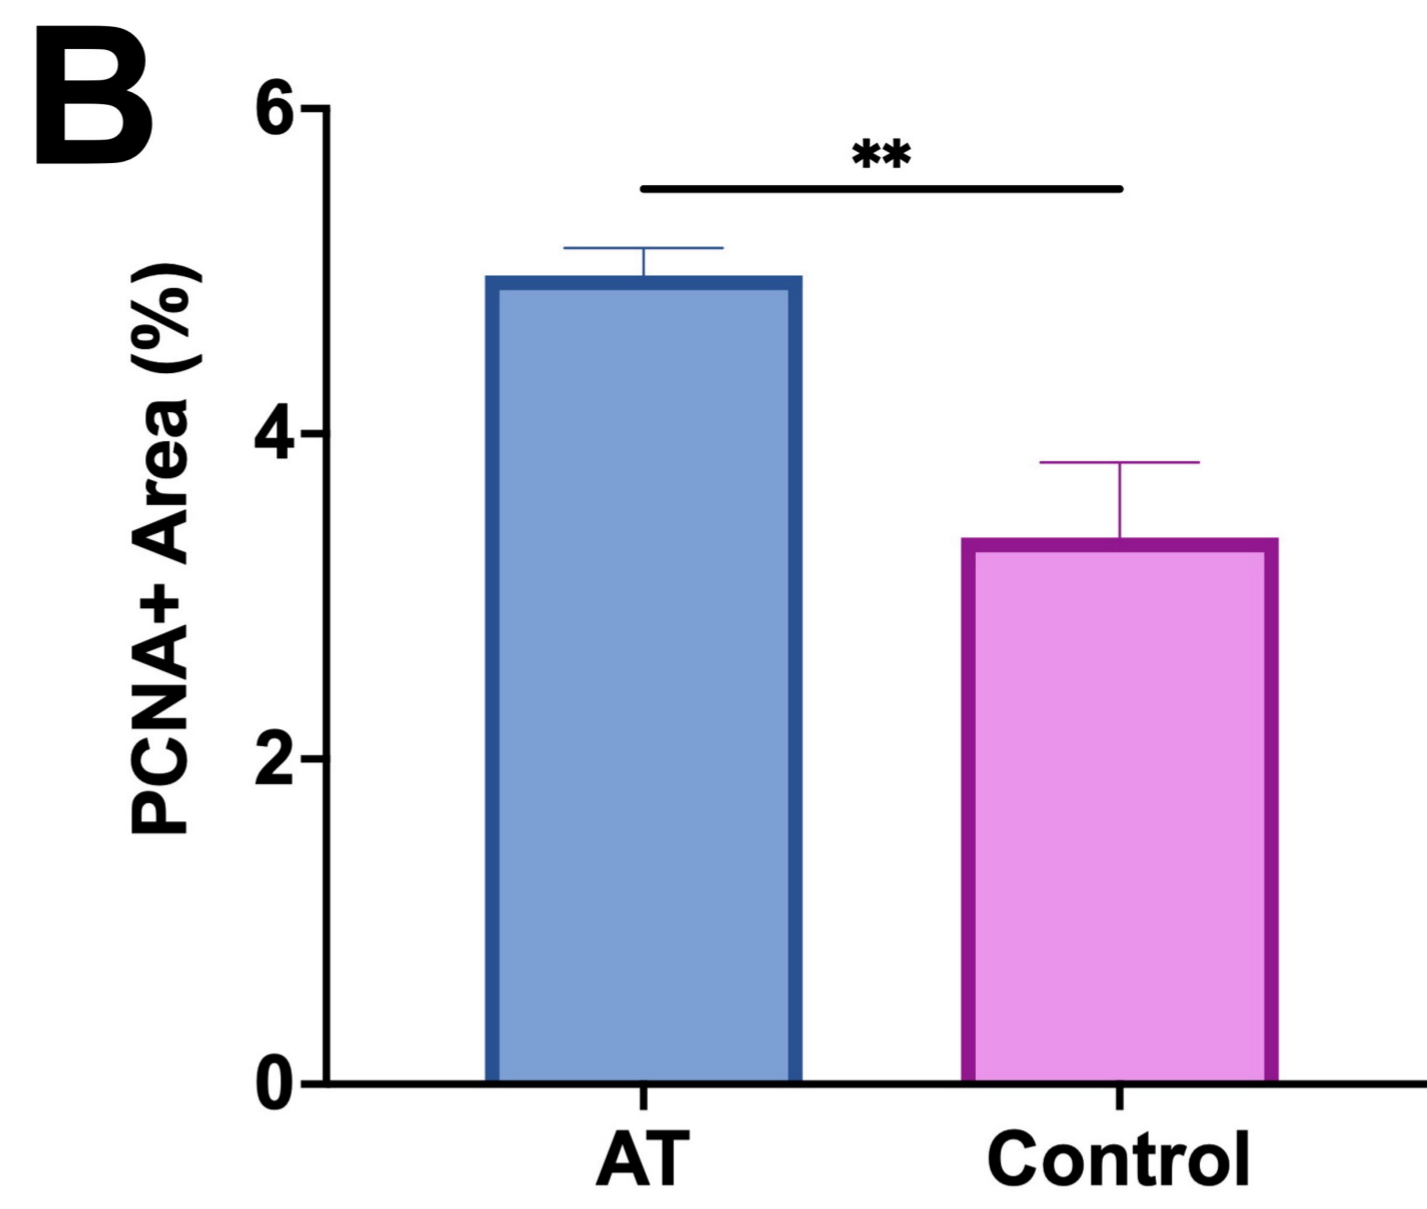

**C**

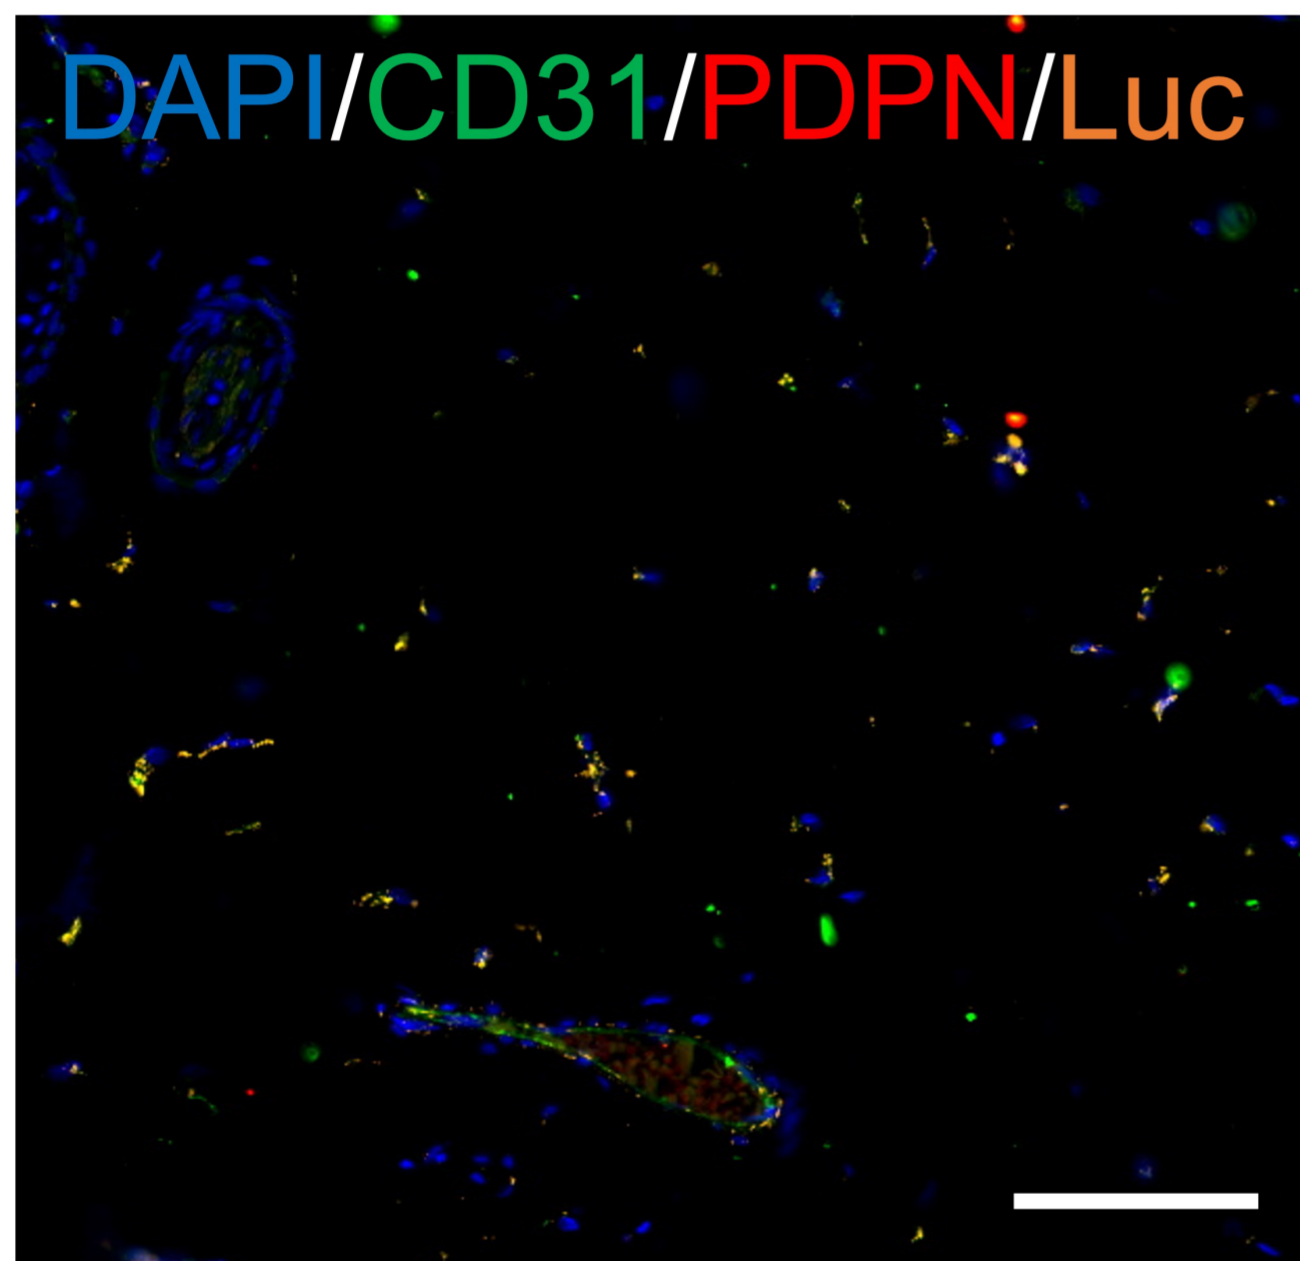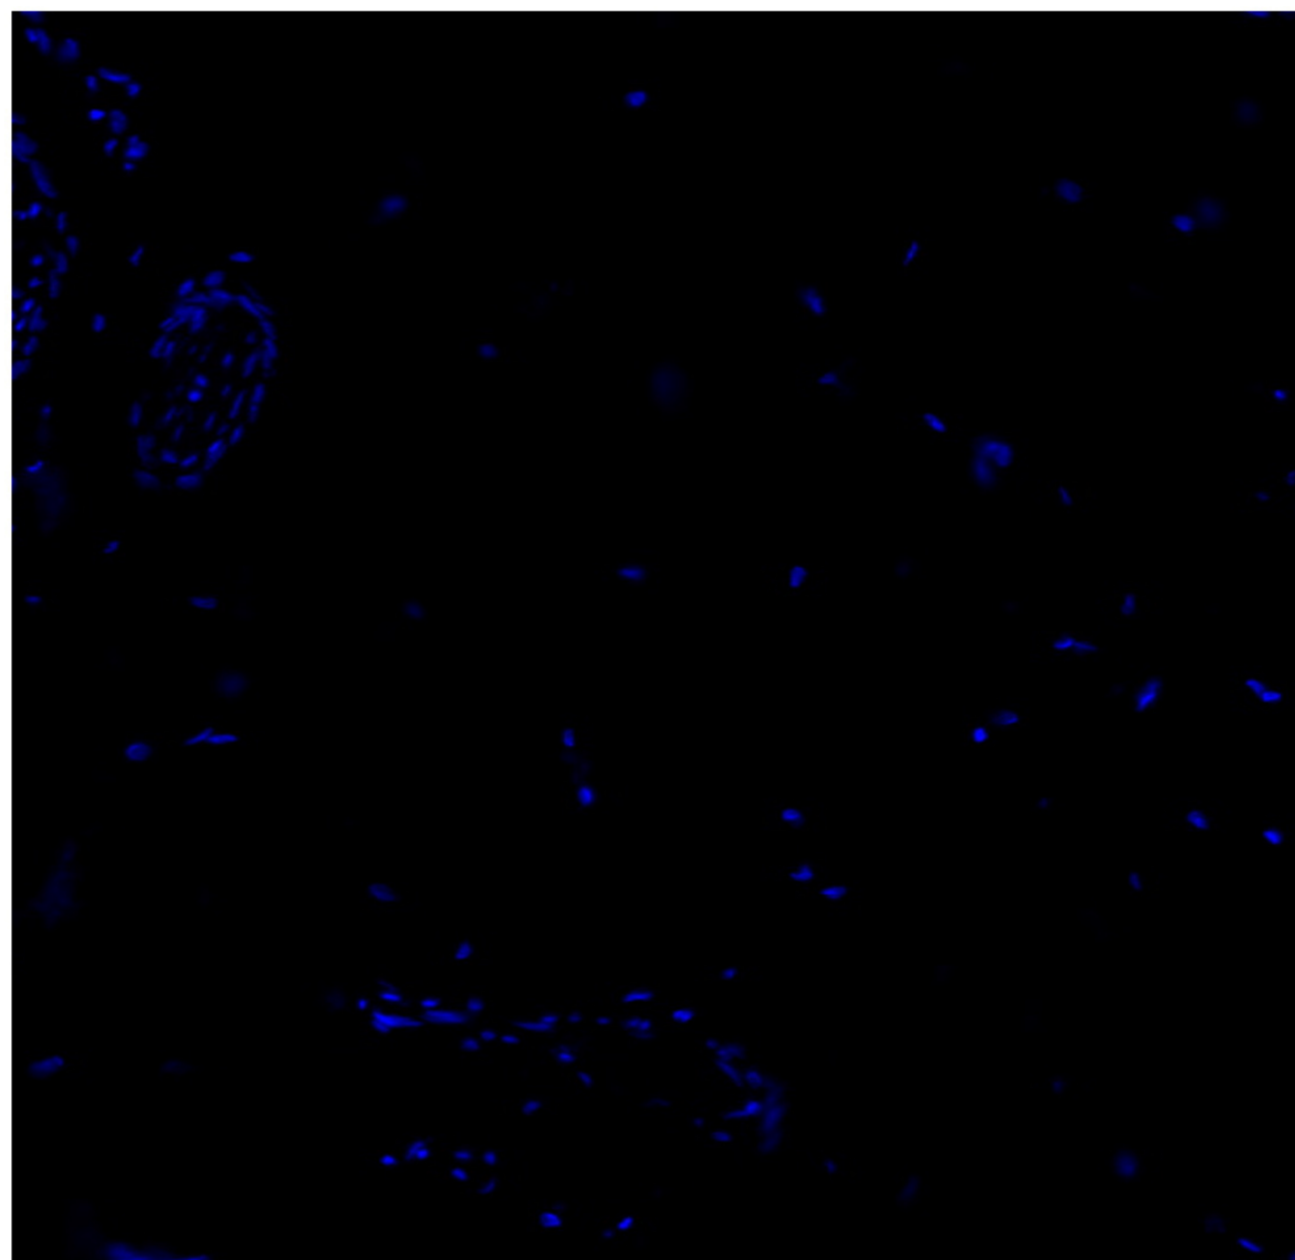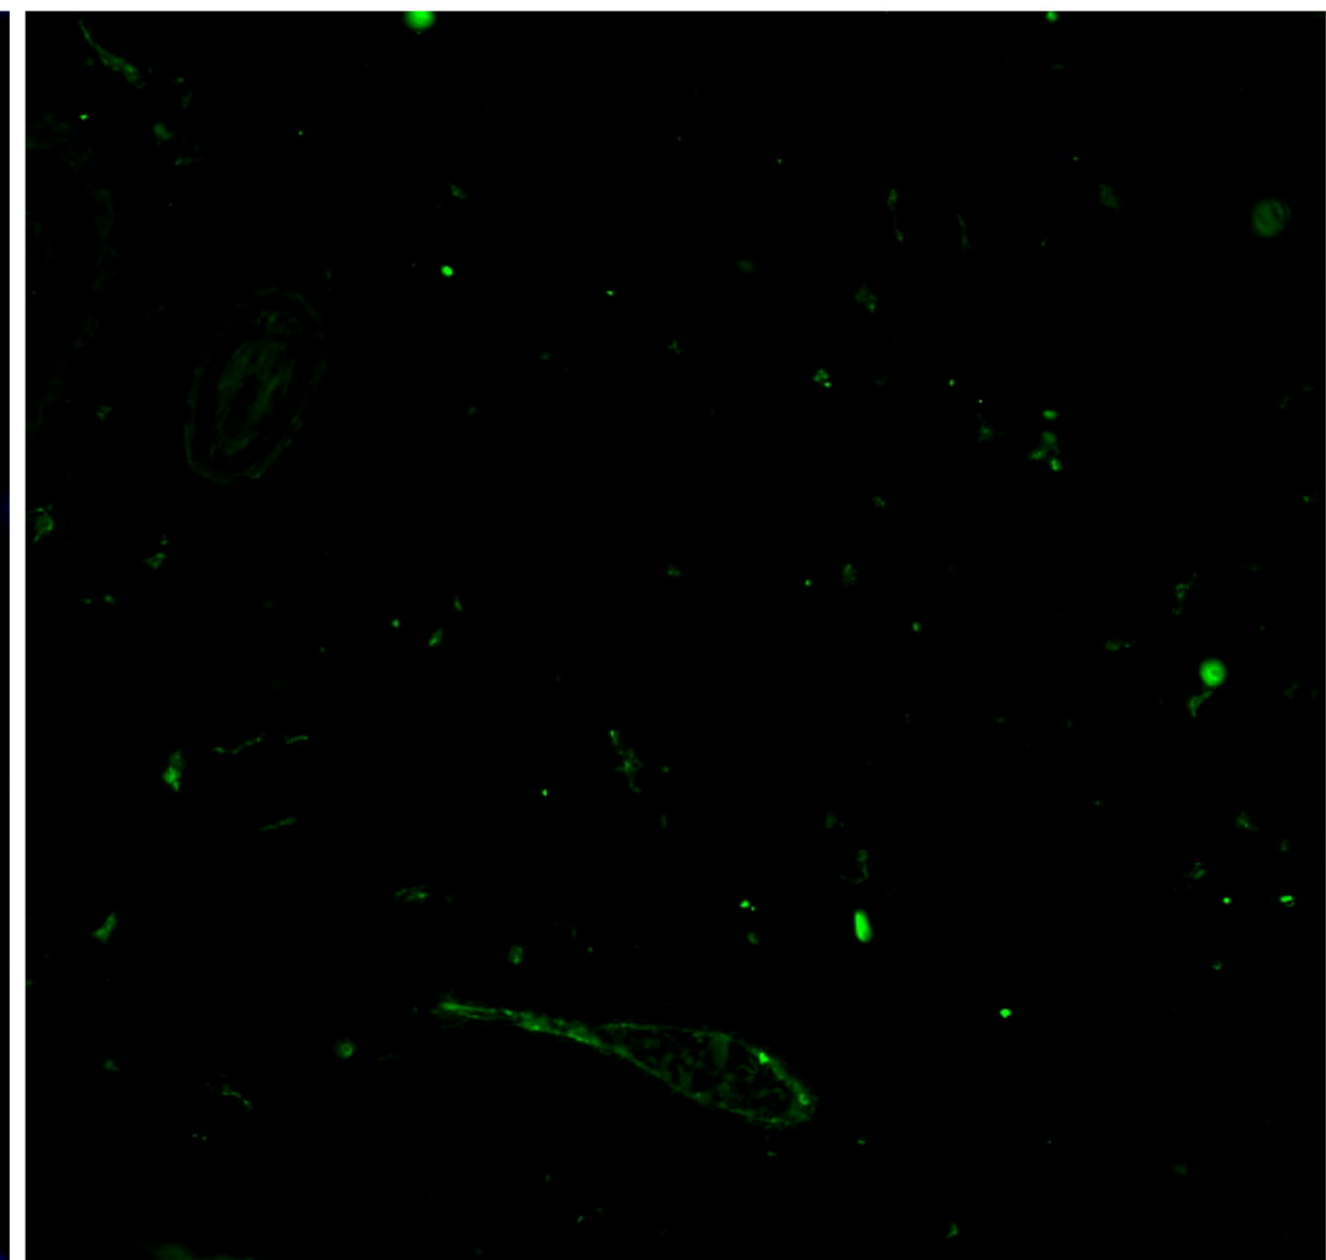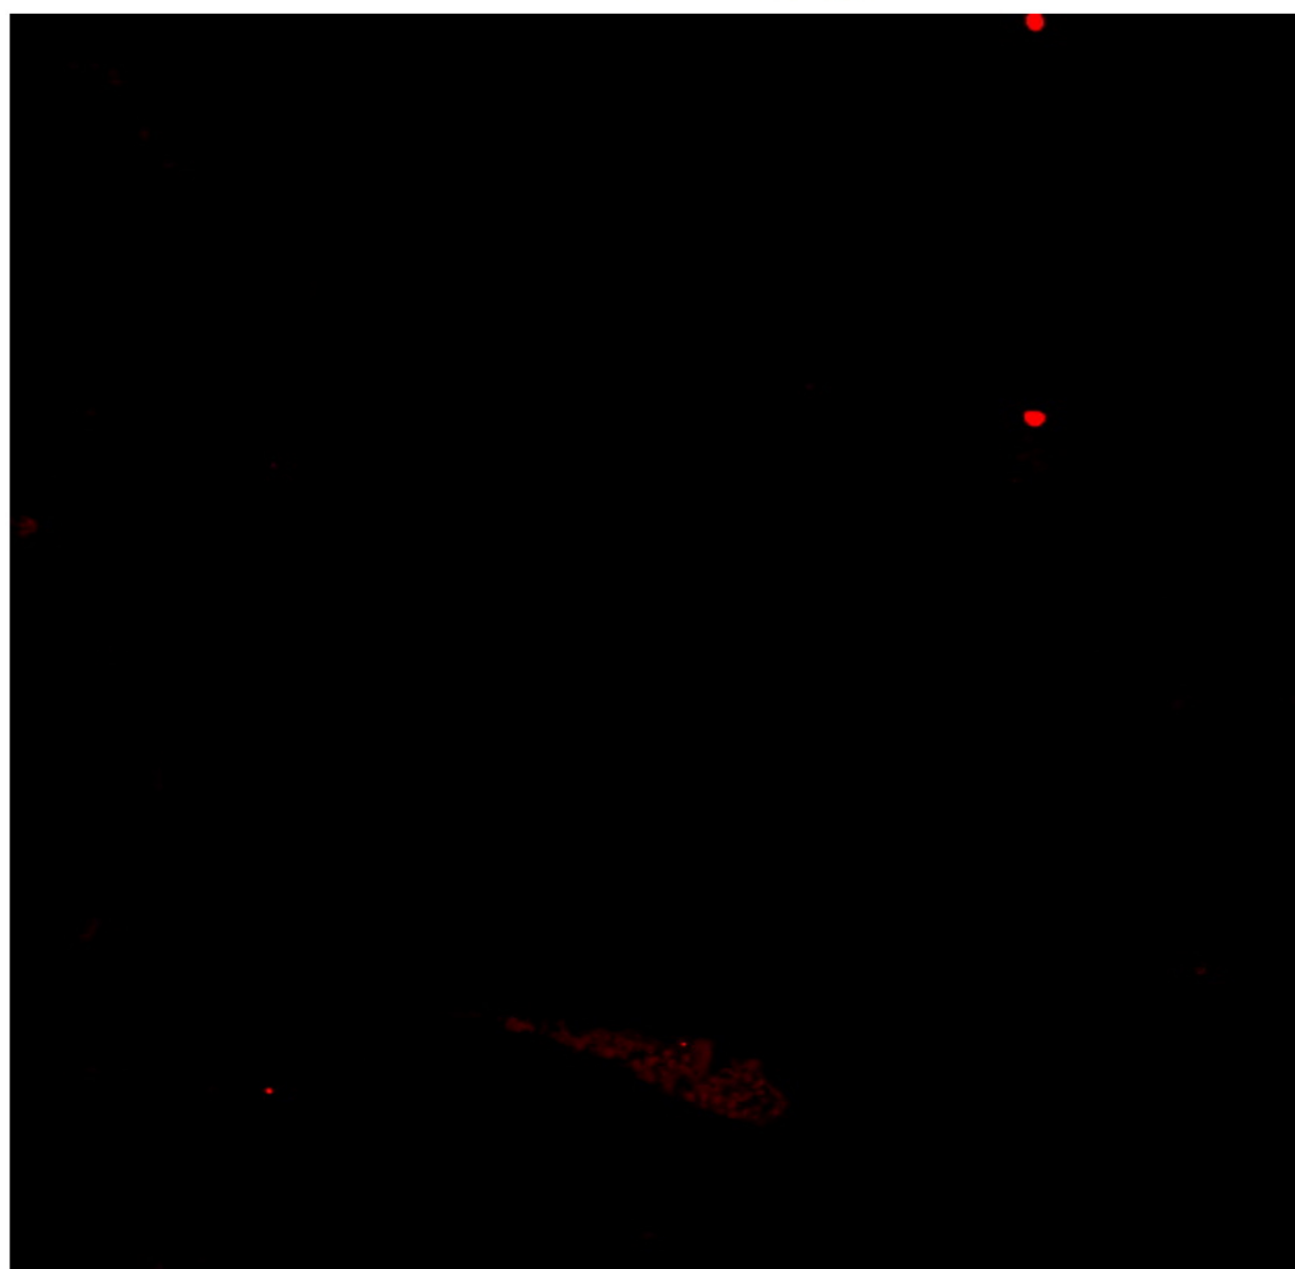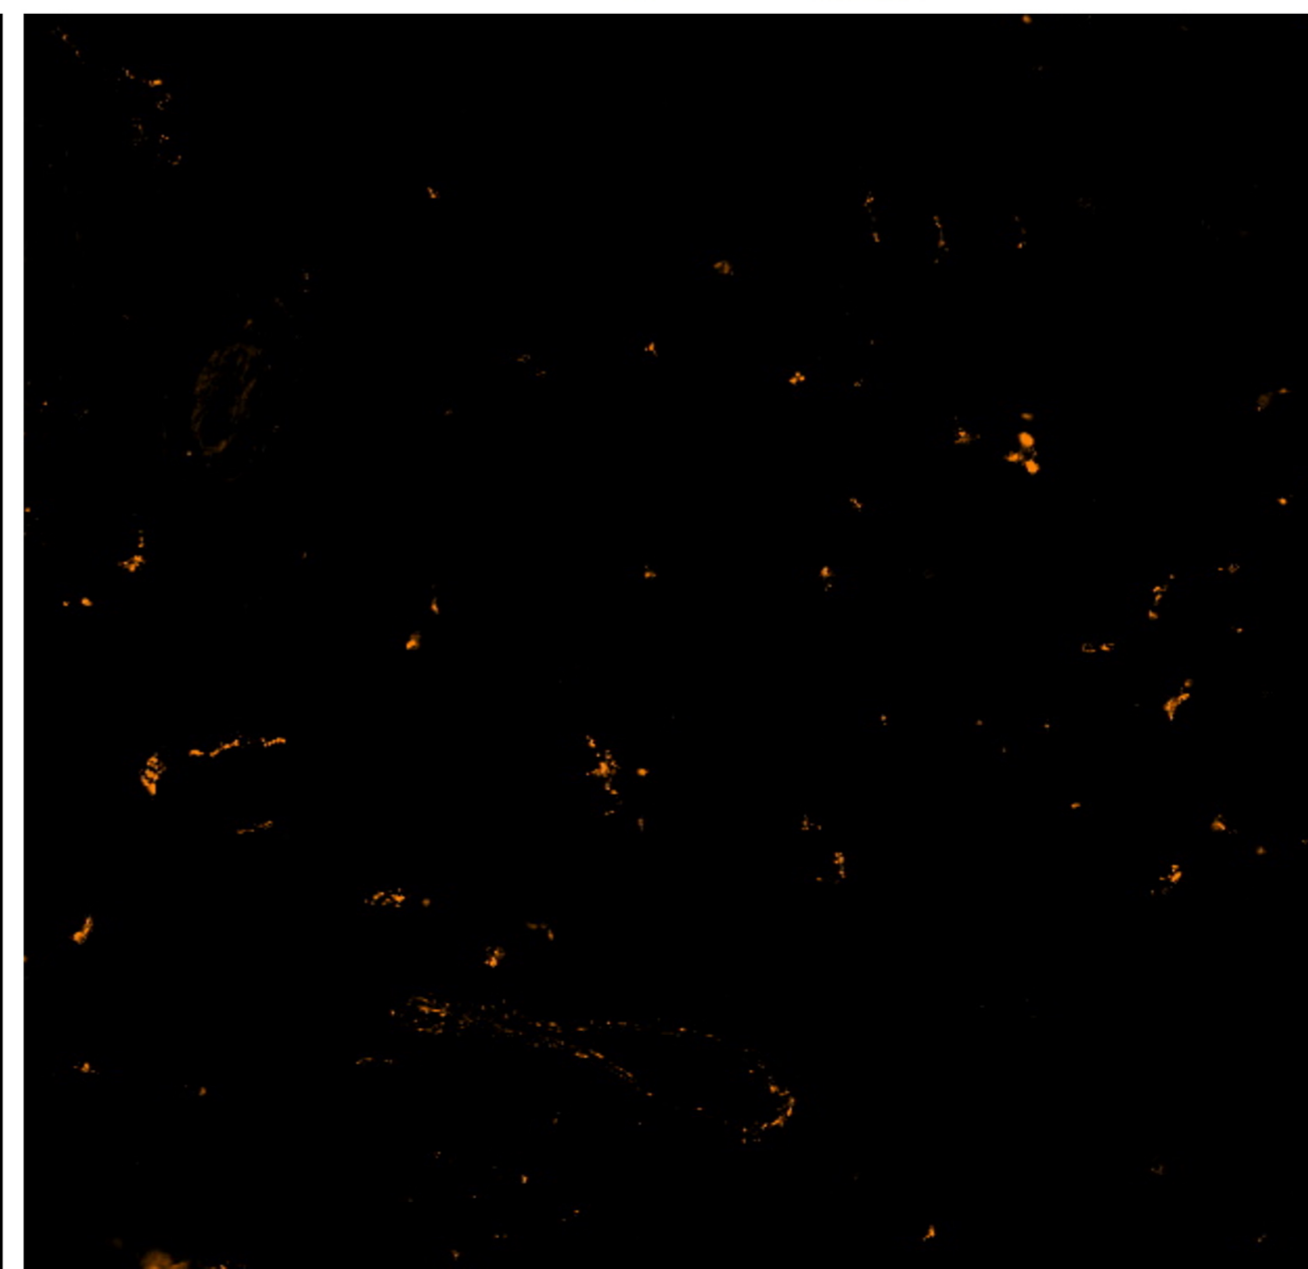

Supplement: prs-153-558e-s004.pdf [file prs-153-558e-s004.pdf]

**DAPI**

**Lucifarese**

**Merge**

**Expanded  
skin**

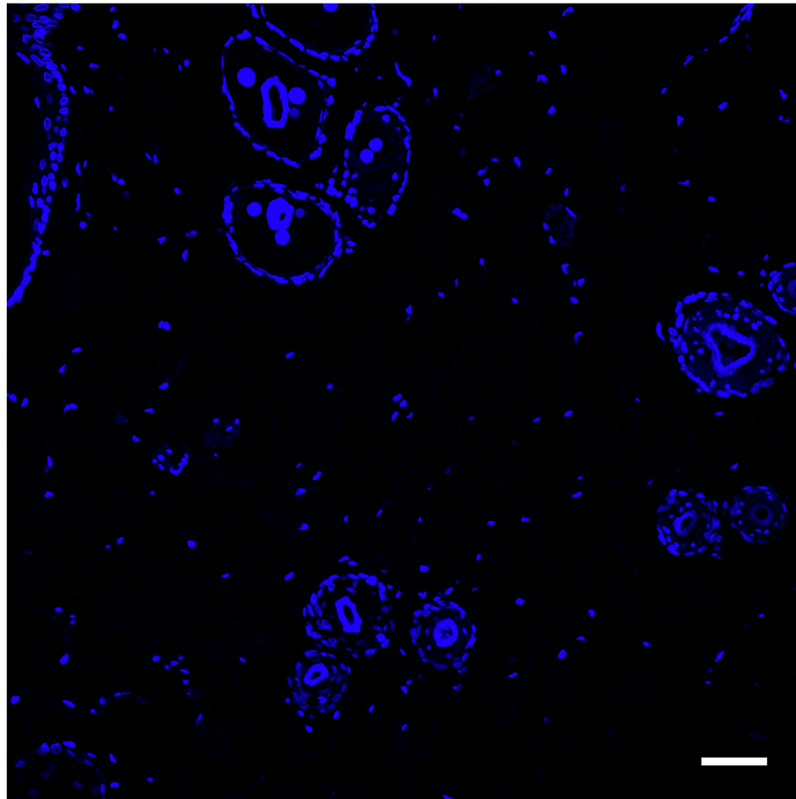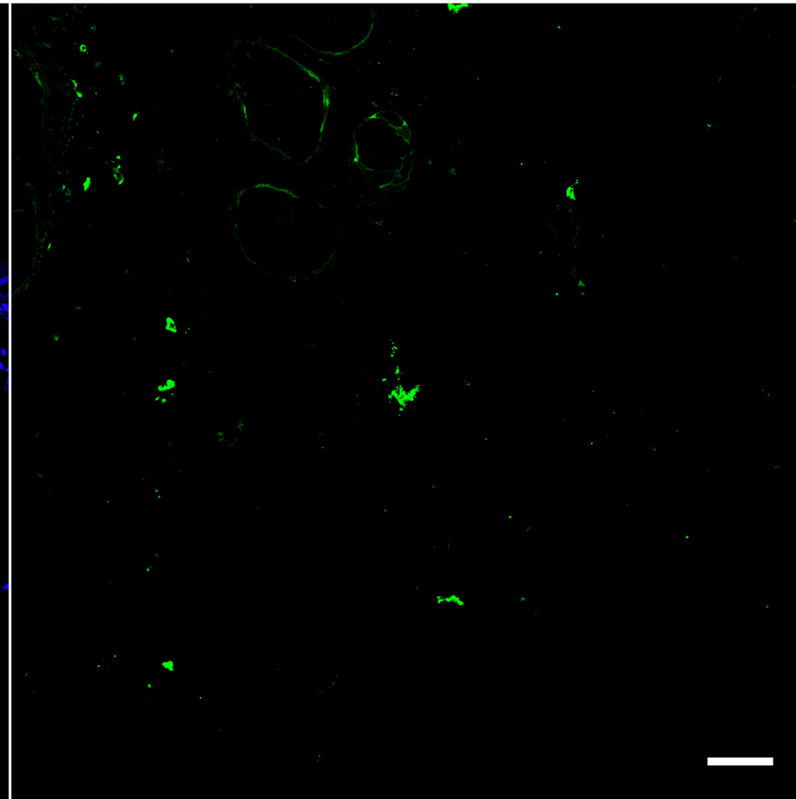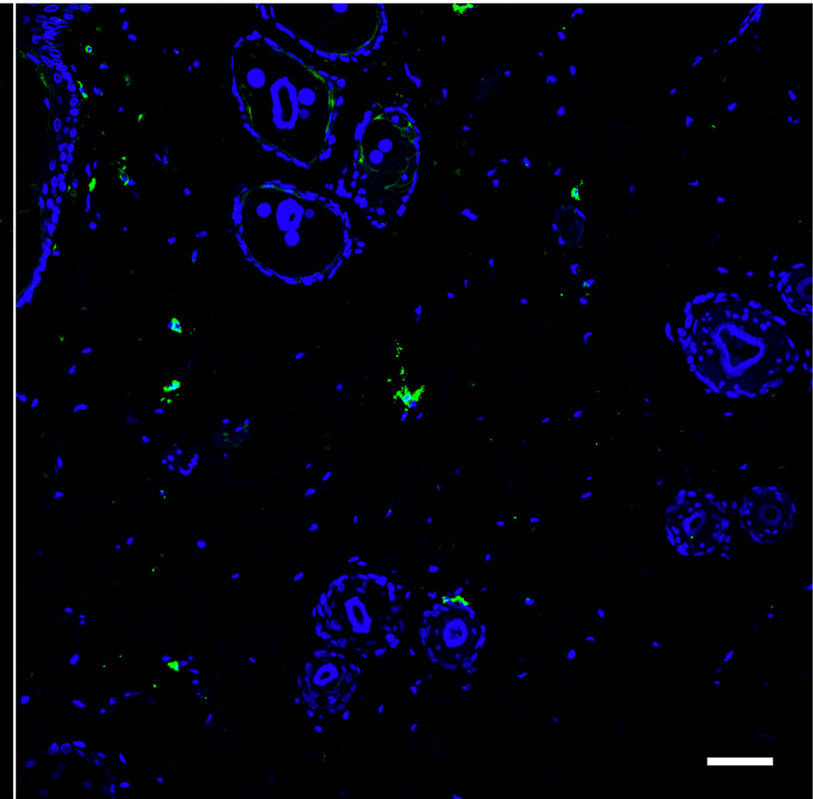

**Subcutaneous  
adipose tissue**

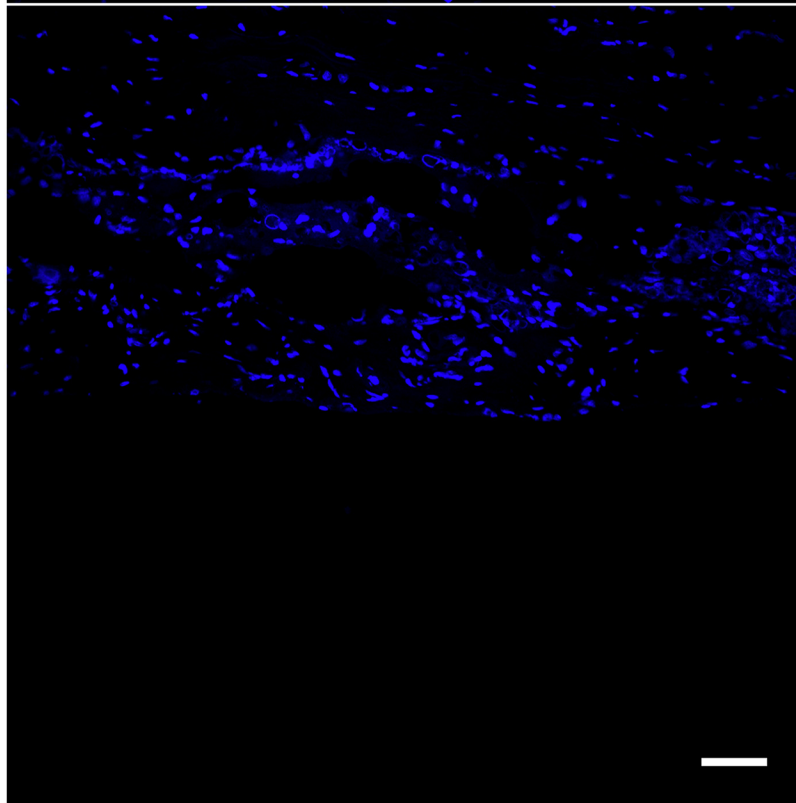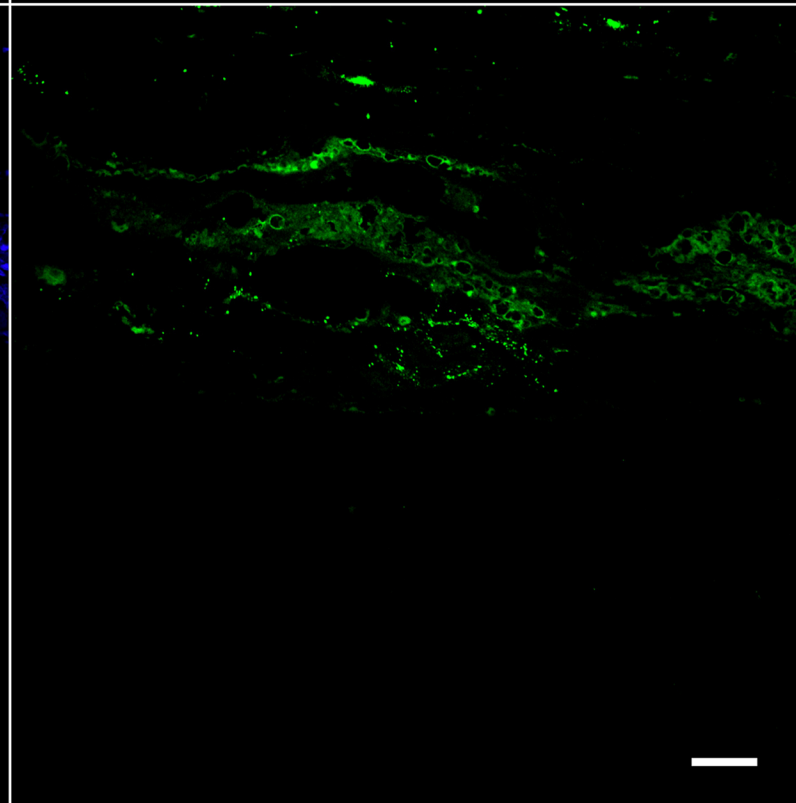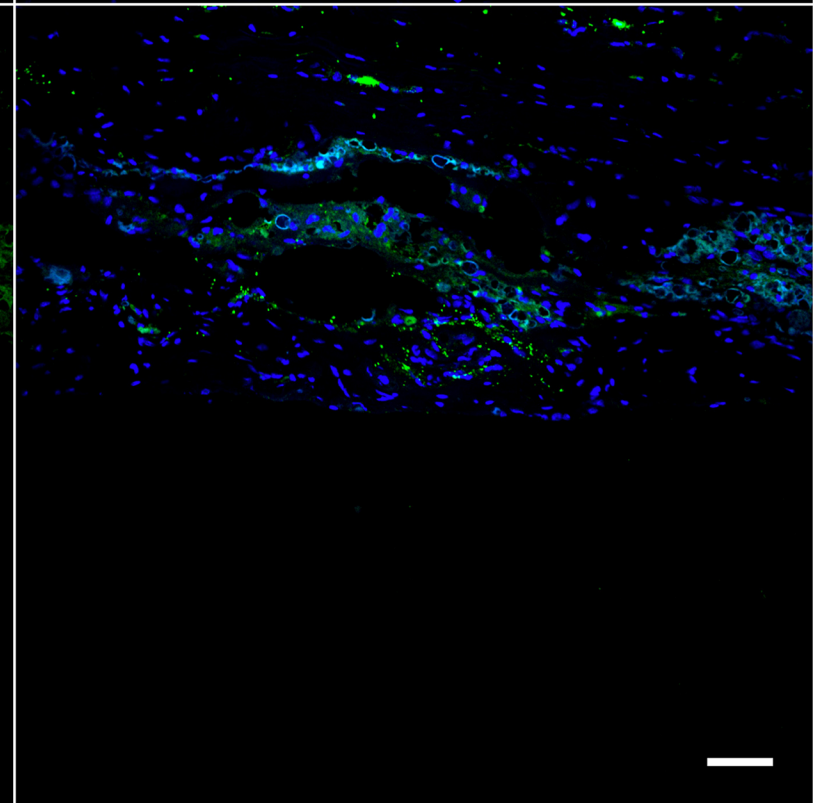

Supplement: prs-153-558e-s005.pdf [file prs-153-558e-s005.pdf]
